# Supplementary material for: Simultaneous binding of carboxyl and amino groups to liquid metal surface for biosensing
Source: Royal Society of Chemistry journal article supplement (doi:10.1039/d4tb01459f), 2024-01-01
Supplement: d4tb01459f1.pdf [file d4tb01459f1.pdf]

## Supporting Information

### **Simultaneous Binding of Carboxyl and Amino Groups to Eutectic Gallium-Indium Nanoparticle Surface for Biosensing**

Zhiheng Zhang<sup>1</sup>, Hongchen Chen<sup>1</sup>, Weize Diao<sup>1</sup>, Chuangxin Zhou<sup>1</sup>, Guozhen Liu\*

Integrated Devices and Intelligent Diagnosis (ID<sup>2</sup>) Laboratory, CUHK(SZ)-Boyalife Joint Laboratory for Regenerative Medicine Engineering, Biomedical Engineering Programme, School of Medicine, The Chinese University of Hong Kong, Shenzhen, 518172, China

<sup>1</sup>Contribute equally.

\*Corresponding author email: [liuguozhen@cuhk.edu.cn](mailto:liuguozhen@cuhk.edu.cn) (G.L.)

**Table S1.** Summary information of all EGaIn based nanoparticles used in the study.

| Samples    | Sample name                                   | Chemical formula                                                            | Structure                                                                            |
|------------|-----------------------------------------------|-----------------------------------------------------------------------------|--------------------------------------------------------------------------------------|
| Pure PPD   | <i>p</i> -phenylenediamine                    | C <sub>6</sub> H <sub>8</sub> N <sub>2</sub>                                | 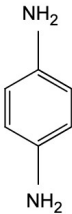    |
| Pure PABA  | <i>p</i> -aminobenzoic acid                   | C <sub>7</sub> H <sub>7</sub> NO <sub>2</sub>                               |    |
| Pure TPA   | terephthalic acid                             | C <sub>8</sub> H <sub>6</sub> O <sub>4</sub>                                |   |
| Pure 4CT   | 4-carboxylbenzene diazonium tetrafluoroborate | C <sub>7</sub> H <sub>5</sub> BF <sub>4</sub> N <sub>2</sub> O <sub>2</sub> |  |
| Pure EGaIn | eutectic gallium-indium                       | None                                                                        |   |
| EGaIn-PPD  | EGaIn- <i>p</i> -phenylenediamine             | None                                                                        |  |
| EGaIn-PABA | EGaIn- <i>p</i> -aminobenzoic acid            | None                                                                        |  |

|           |                                                     |      |                                                                                    |
|-----------|-----------------------------------------------------|------|------------------------------------------------------------------------------------|
| EGaIn-TPA | EGaIn- terephthalic acid                            | None | 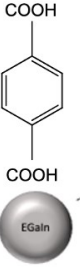 |
| EGaIn-4CT | EGaIn-4-carboxylbenzene diazonium tetrafluoroborate | None |  |

**Table S2.** Comparison of the performance of aptasensors for electrochemical detection of IL-6.

| <b>Material/Electrode</b>                                   | <b>LOD</b> | <b>References</b> |
|-------------------------------------------------------------|------------|-------------------|
| Paper biosensors                                            | 1.3 pg/mL  | [1]               |
| ZnO                                                         | 2 pg/mL    | [2]               |
| Poly(guanine)-functionalized silica NPs                     | 50 pg/mL   | [3]               |
| Phosphatase functionalized nanospheres Au working electrode | 10 pg/mL   | [4]               |
| EGaIn-PABA-Au                                               | 1 pg/mL    | This work         |

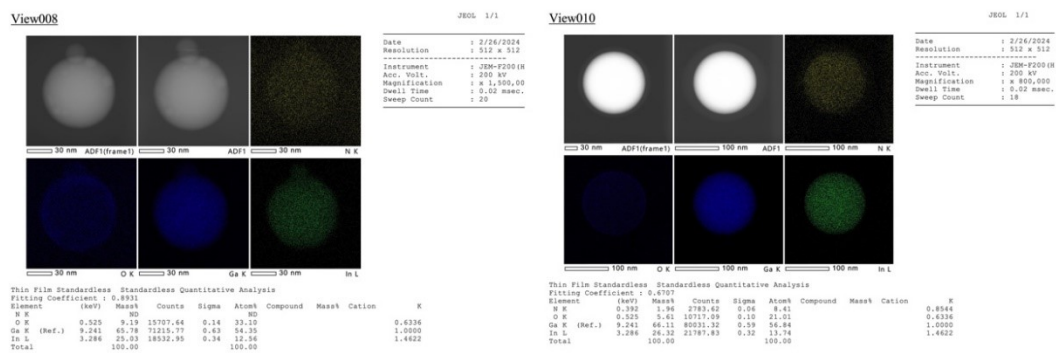

**Figure S1.** TEM-EDS content of gallium, indium, oxygen, carbon, nitrogen and bromine on EGaIn-PABA-AuNPs (left) and EGaIn-PABA (right) nanoparticles.

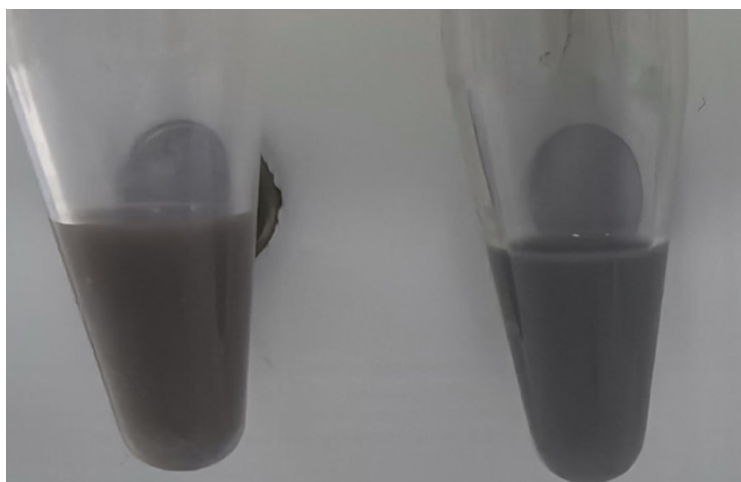

**Figure S2.** Picture of EGaIn-PABA-AuNPs (left) and EGaIn-PABA (right) nanoparticles dispersed in the MilliQ water in a tube.

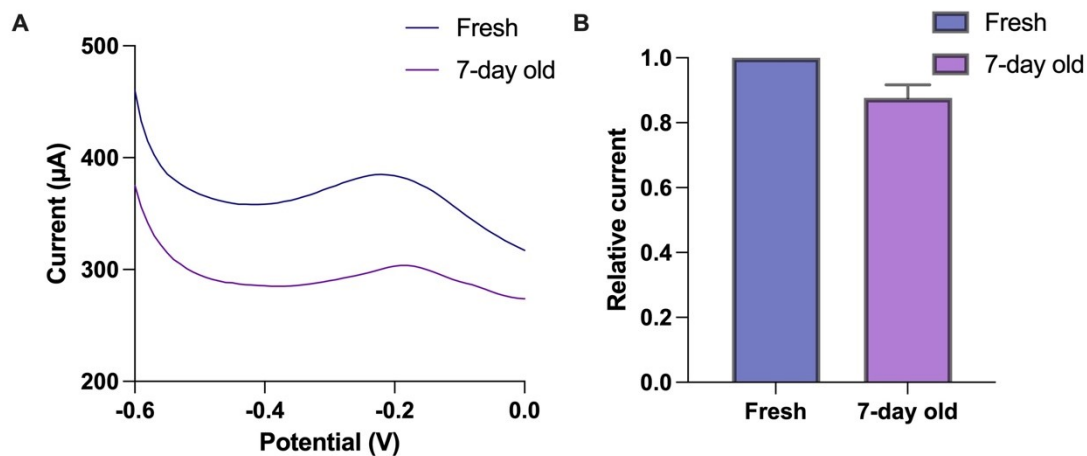

**Figure S3.** Performance comparison of the EGaIn-PABA-AuNPs-Apt aptasensor prepared by using the fresh and 7-day old EGaIn-PABA-AuNPs. (A) Square wave voltammograms and (B) The relative current of the EGaIn-PABA-AuNPs-Apt for detection of 200 pg/mL IL-6. The peak current is the peak current divided by the peak current of EGaIn-PABA-AuNPs-Apt aptasensor prepared by using the fresh EGaIn-PABA-AuNPs.

**References:**

- [1] C. Adrover-Jaume, A. Alba-Patiño, A. Clemente, G. Santopolo, A. Vaquer, S.M. Russell, E. Barón, M.D.M. González Del Campo, J.M. Ferrer, M. Berman-Riu, M. García-Gasalla, M. Aranda, M. Borges, R. de la Rica, Paper biosensors for detecting elevated IL-6 levels in blood and respiratory samples from COVID-19 patients, *Sens Actuators B Chem*, 330 (2021) 129333.
- [2] R.D. Munje, S. Muthukumar, B. Jagannath, S. Prasad, A new paradigm in sweat based wearable diagnostics biosensors using Room Temperature Ionic Liquids (RTILs), *Sci Rep*, 7 (2017) 1950.
- [3] J. Wang, G. Liu, M.H. Engelhard, Y. Lin, Sensitive immunoassay of a biomarker tumor necrosis factor- $\alpha$  based on poly(guanine)-functionalized silica nanoparticle label, *Anal Chem*, 78 (2006) 6974-6979.
- [4] Z. Yin, Y. Liu, L.-P. Jiang, J.-J. Zhu, Electrochemical immunosensor of tumor necrosis factor  $\alpha$  based on alkaline phosphatase functionalized nanospheres, *Biosensors and Bioelectronics*, 26 (2011) 1890-1894.
